# Supplementary material for: A Steiner tree-based method for biomarker discovery and classification in breast cancer metastasis
Source: PubMed Central journal article supplement (PMC3481447; doi:10.1186/1471-2164-13-s6-s8), 2012-10-26

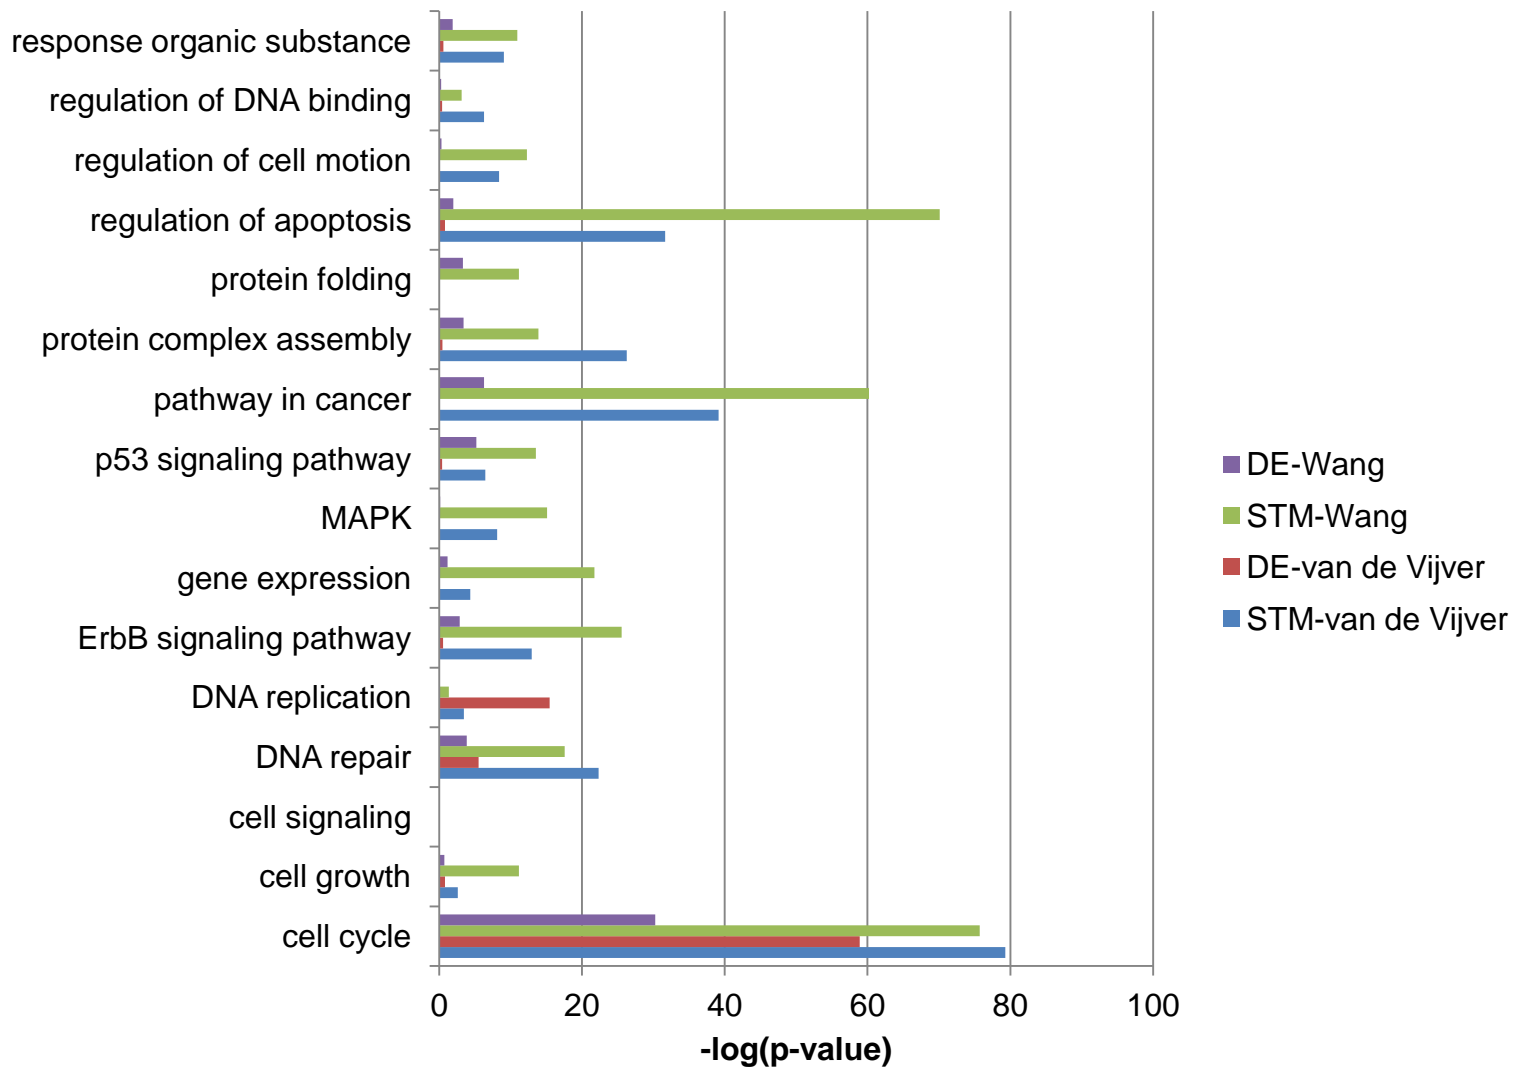

Supplement: 1471-2164-13-S6-S8-S2.pdf [file 1471-2164-13-S6-S8-S2.pdf]
